# Supplementary material for: Enhancement of the peroxidase-like activity of hollow spherical FexNi1−xS2/SC nanozymes
Source: Royal Society of Chemistry journal article supplement (doi:10.1039/d3dt01501g), 2023-01-01
Supplement: d3dt01501g1.pdf [file d3dt01501g1.pdf]

## Supporting information

### Enhancement of Peroxidase-like Activity for Hollow Spherical $\text{Fe}_x\text{Ni}_{1-x}\text{S}_2/\text{SC}$ Nanozyme

Hao Tan, Chen Li, and Zhaodong Nan

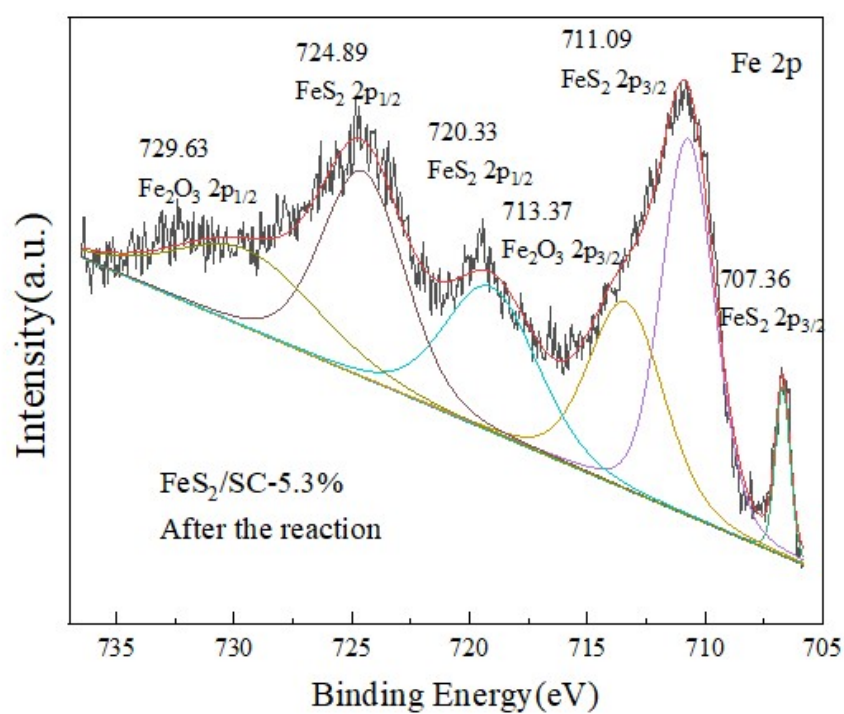

**Figure S1.** Fe2p XPS spectra of  $\text{FeS}_2/\text{SC}$  after the enzyme-catalyzed reaction.

**Response Surface Methodology (RSM).** The experimental temperature was fixed at 25 °C, the concentrations of H<sub>2</sub>O<sub>2</sub> and TMB were 60 μM and 1.2 mM, respectively, and the reaction time was 1 min. The solution pH ( $X_1$ ), nanozymic dosage (μg/mL,  $X_2$ ), and Ni<sup>2+</sup> concentration (mM,  $X_3$ ) were independent variables, the absorbance value at 652nm ( $A_{652nm}$ ,  $y$ ) was the dependent variable. The response surface method (RSM) based on BBD (Box-Behnken Design) was used to optimize the experimental conditions, and the second-order polynomial equation (as shown in Equ. (1)) was obtained. The reaction conditions were optimized according to the optimal solution of the equation:

$$y = 1.74 - 0.1375X_1 + 0.0478X_2 + 0.0247X_3 - 0.0169X_1X_2 - 0.0181X_1X_3 + 0.0825X_2X_3 - 0.5323X_1^2 - 0.141X_2^2 - 0.1585X_3^2 \quad (1)$$

Table S1 lists the values of  $X_1$ ,  $X_2$ , and  $X_3$ . For example,  $A_{652nm}$  is the highest at pH = 4.0 among 3.0, 3.5, 4.0, 4.5, 5.0, and 5.5. So  $X_1$  was selected for 3.5, 4.0, and 4.5. Table S1 lists the experimental and calculated results ( $A_{652nm}$ ), indicating that Eq. (1) can be used as the model for the prediction experiment. The two-dimensional (2D) contour and three-dimensional (3D) surface drawings are shown in Figure S2. The individual and mutual effects among the dependent and independent variables can be reflected by two-dimensional (2D) contour lines and three-dimensional (3D) topographic maps. The two-dimensional contour lines are elliptical contour lines, indicating that the interaction is significant.<sup>1</sup> Figure S2A and D reflect the interaction effect of the concentration of Ni<sup>2+</sup> (3.0 mM), pH, and the amount of nanozyme.  $A_{652nm}$  increases with the increase of pH and the amount of enzyme. In the contour line, the center of the ellipse is the optimal

value. It is clear from the figure that the pH is close to 3.92 and the nanozyme dosage is optimal at close to 73  $\mu\text{g/mL}$ . It can be seen that this analysis method can make up for the defects of single factor experiment. Figure S2B and Figure S2E show the interaction between pH and C loading at a fixed dosage of nanozyme (70  $\mu\text{g/mL}$ ). Figure S2C and Figure S2F reflect the interaction effect of nano-enzyme dosage and C load on absorbance value when pH of fixed solution is 4. In order to obtain the optimal experimental conditions, the optimal solution of the second-order polynomial equation was obtained as pH 3.92, concentration of nanozyme 73  $\mu\text{g/mL}$ , and concentration of  $\text{Ni}^{2+}$  3.2 mM corresponding to  $\text{Fe}_{0.75}\text{Ni}_{0.25}\text{S}_2/\text{SC}$  based on the ICP results.

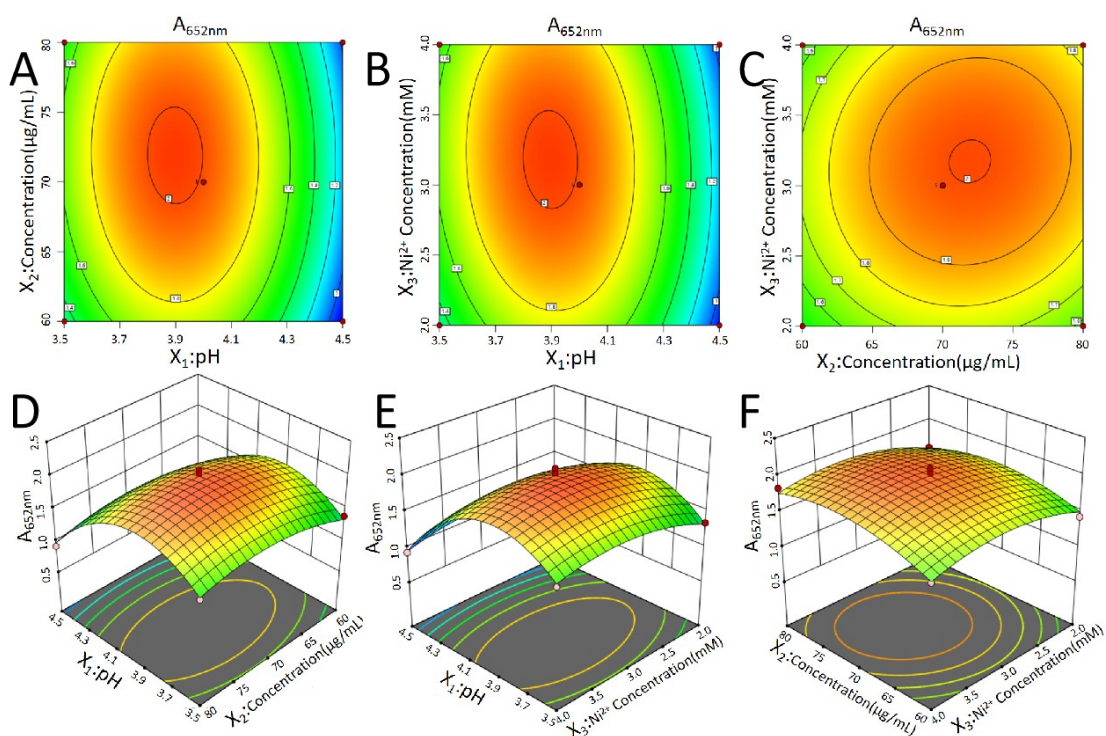

**Figure S2.** 2D contour diagram and 3D surface diagram of the influence of various factors on POD activity ( $A_{652}$ ), (A) and (D)  $X_1$  and  $X_2$  ( $X_3 = 3.0$ ), (B) and (E)  $X_1$  and  $X_3$  ( $X_2 = 70$ ), (C) and (F)  $X_2$  and  $X_3$  ( $X_1 = 4.0$ ).

**Table S1.** Experimental and calculated results based on Eq. (1).

| Run | $X_1$ | $X_2(\mu\text{g/mL})$ | $X_3(\text{mM})$ | $y(A_{652nm})$ |            |
|-----|-------|-----------------------|------------------|----------------|------------|
|     |       |                       |                  | Experimental   | Calculated |
| 1   | 3.5   | 80                    | 3.0              | 1.48           | 1.51       |
| 2   | 4.0   | 70                    | 3.0              | 2.02           | 1.99       |
| 3   | 4.0   | 80                    | 4.0              | 1.83           | 1.76       |
| 4   | 4.5   | 80                    | 3.0              | 0.92           | 0.97       |
| 5   | 4.0   | 70                    | 3.0              | 1.99           | 1.99       |
| 6   | 4.0   | 60                    | 4.0              | 1.54           | 1.55       |
| 7   | 4.0   | 60                    | 2.0              | 1.42           | 1.49       |
| 8   | 4.0   | 70                    | 3.0              | 1.91           | 1.99       |
| 9   | 4.0   | 70                    | 3.0              | 1.95           | 1.99       |
| 10  | 4.0   | 80                    | 2.0              | 1.59           | 1.58       |
| 11  | 3.5   | 70                    | 2.0              | 1.34           | 1.32       |
| 12  | 4.0   | 70                    | 3.0              | 2.09           | 1.99       |
| 13  | 3.5   | 60                    | 3.0              | 1.38           | 1.33       |
| 14  | 4.5   | 70                    | 2.0              | 0.95           | 0.91       |
| 15  | 3.5   | 70                    | 4.0              | 1.49           | 1.53       |
| 16  | 4.5   | 60                    | 3.0              | 0.89           | 0.86       |
| 17  | 4.5   | 70                    | 4.0              | 0.93           | 0.94       |

In order to further evaluate the adequacy and significance of the model, a linear analysis was conducted on the changes between the predicted value of the model and the experimental value, and a good correlation was obtained ( $R^2 = 0.9894$ ), with a slope of 0.98521, as shown in Figure S3A, indicating a significant model fitting.<sup>2</sup> In addition, the residual distribution map is also an important factor to evaluate whether the model

fitting results are significant. As shown in Figure S3B, it fits well with the straight line, indicating that there is no serious non-normality.<sup>3</sup> In addition, as shown in Figure S3C, no matter how the predicted value changes, the residual distribution is between -3.0 and +3.0.<sup>3</sup> The results show that the model can better reflect the relationship between  $A_{652nm}$  (y) and independent variables ( $X_1$ ,  $X_2$ , and  $X_3$ ).<sup>4</sup> ANOVA analysis was performed on the model, as shown in Table S2. F value is 98.05 and P value is  $>0.0001$ , indicating that the model is significant. The comparison of factor f of each variable can reflect its influence on the dependent variable ( $A_{652nm}$ ). By comparing the F value of each variable factor, their influence on the dependent variable ( $A_{652nm}$ ) can be reflected.<sup>5</sup> The results showed that the influence capacity of  $A_{652nm}$  was pH  $>$  nanozymic concentration  $>$  Ni<sup>2+</sup> concentration. "Lack of Fit F-value" is 0.0078, indicating that is not significant compared to the pure error. The second-order polynomial model coefficient ( $R^2$ ) and adjustment coefficient ( $R^2$ ) were 0.9875 and 0.9714, respectively, indicating that the model response values were in good agreement with the experimental values.<sup>6</sup> The variance coefficient (C.V.%) is 4.72, indicating the model high accuracy and reliability.<sup>6</sup>

**Table S2** ANOVA for  $A_{652\text{ nm}}$  from BBD.

| Source | Sum of Squares | df | Mean Square | F-value | p-value    |             |
|--------|----------------|----|-------------|---------|------------|-------------|
| Model  | 1.68           | 9  | 0.1867      | 61.31   | $< 0.0001$ | significant |
| $X_1$  | 0.1512         | 1  | 0.1512      | 49.68   | $< 0.0001$ |             |
| $X_2$  | 0.0183         | 1  | 0.0183      | 6.01    | 0.0441     |             |
| $X_3$  | 0.0049         | 1  | 0.0049      | 1.60    | 0.2462     |             |

|             |        |    |                          |         |          |                 |
|-------------|--------|----|--------------------------|---------|----------|-----------------|
| $X_1X_2$    | 0.0011 | 1  | 0.0011                   | 0.3741  | 0.5601   |                 |
| $X_1X_3$    | 0.0013 | 1  | 0.0013                   | 0.4316  | 0.5322   |                 |
| $X_2X_3$    | 0.0272 | 1  | 0.0272                   | 8.94    | 0.0202   |                 |
| $X_1^2$     | 1.19   | 1  | 1019                     | 391.78  | < 0.0001 |                 |
| $X_2^2$     | 0.0837 | 1  | 0.0837                   | 27.50   | 0.0015   |                 |
| $X_3^2$     | 0.1057 | 1  | 0.1057                   | 34.73   | 0.0006   |                 |
| Residual    | 0.0213 | 7  | 0.0213                   |         |          |                 |
| Lack of Fit | 0.0078 | 3  | 0.0078                   | 0.7747  | 0.5659   | not significant |
| Pure Error  | 0.0135 | 4  | 0.01335                  |         | .        |                 |
| Cor Total   | 1.70   | 16 |                          |         |          |                 |
| Std. Dev.   | 0.0731 |    | R <sup>2</sup>           | 0.9875  |          |                 |
| Mean        | 1.49   |    | Adjusted R <sup>2</sup>  | 0.9714  |          |                 |
| C.V. %      | 4.72   |    | Predicted R <sup>2</sup> | 0.9140  |          |                 |
|             |        |    | Adeq Precision           | 19.8895 |          |                 |

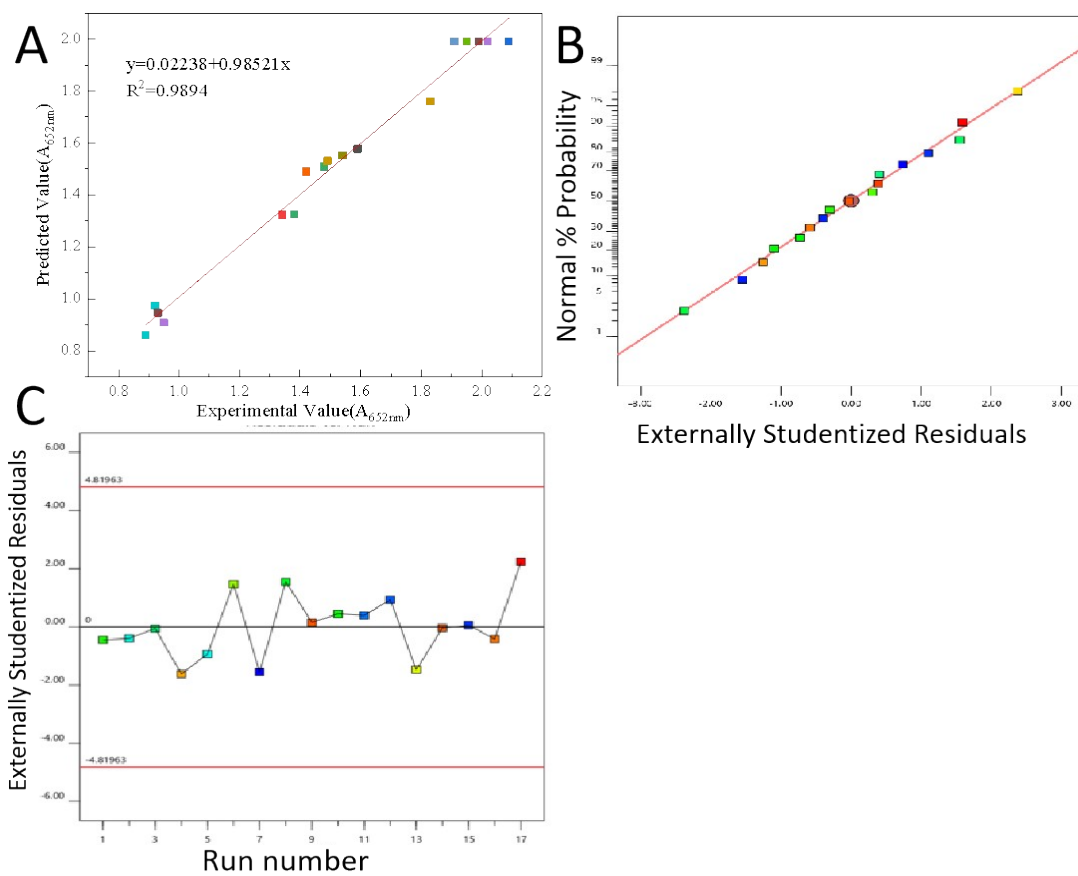

**Figure S3.** (A) Linear relationship between experimental and calculated values of  $A_{652nm}$ , (B) Normal probability diagram of the internalized residual of  $A_{652nm}$ , and (C) running number and residual of  $A_{652nm}$ .

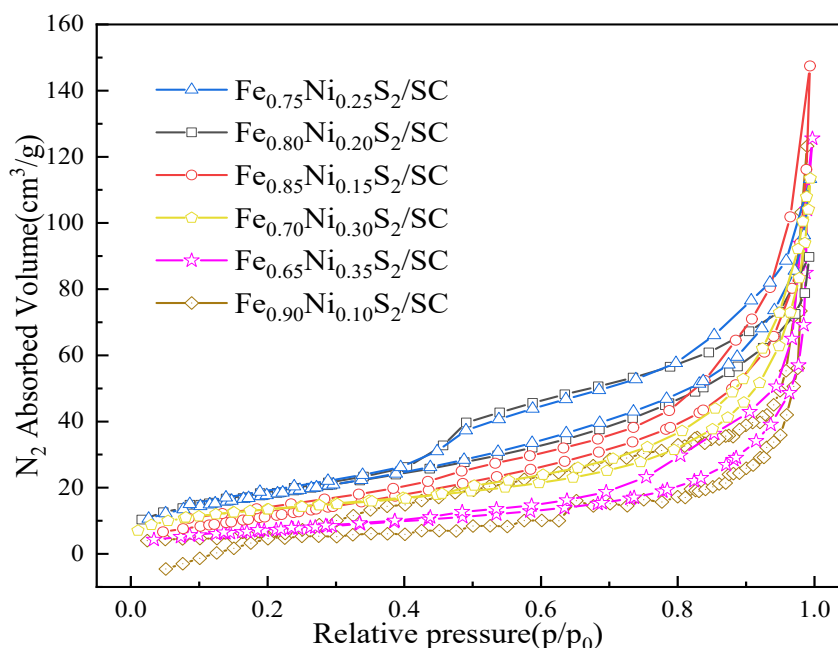

**Figure S4.**  $N_2$  adsorption curves of different catalysts

The  $N_2$  adsorption-desorption isotherms of  $Fe_xNi_{1-x}S_2/SC$  are shown in Figure S4, indicating porous properties of  $Fe_xNi_{1-x}S_2/SC$ . According to the Brunauer-Emmett-Teller model, the BET specific surface areas of these samples were obtained as shown in Table S3. These results indicate that the Ni content increasing related to the increase of the specific surface area of  $Fe_xNi_{1-x}S_2/SC$  ( $Fe_{0.90}Ni_{0.10}S_2/SC$ ,  $Fe_{0.85}Ni_{0.15}S_2/SC$ , and  $Fe_{0.80}Ni_{0.20}S_2/SC$ ). When the Ni content was further increased ( $Fe_{0.75}Ni_{0.25}S_2/SC$  and  $Fe_{0.65}Ni_{0.35}S_2/SC$ ), the specific surface area decreased.

**Table S3.** BET results of Fe<sub>x</sub>Ni<sub>1-x</sub>S<sub>2</sub>/SC

|                        | Fe <sub>0.90</sub> Ni <sub>0.10</sub> S <sub>2</sub> /SC | Fe <sub>0.85</sub> Ni <sub>0.15</sub> S <sub>2</sub> /SC | Fe <sub>0.80</sub> Ni <sub>0.20</sub> S <sub>2</sub> /SC | Fe <sub>0.75</sub> Ni <sub>0.25</sub> S <sub>2</sub> /SC | Fe <sub>0.70</sub> Ni <sub>0.30</sub> S <sub>2</sub> /SC | Fe <sub>0.65</sub> Ni <sub>0.35</sub> S <sub>2</sub> /SC |
|------------------------|----------------------------------------------------------|----------------------------------------------------------|----------------------------------------------------------|----------------------------------------------------------|----------------------------------------------------------|----------------------------------------------------------|
| BET(m <sup>2</sup> /g) | 38.21                                                    | 57.74                                                    | 66.80                                                    | 67.33                                                    | 54.46                                                    | 48.57                                                    |

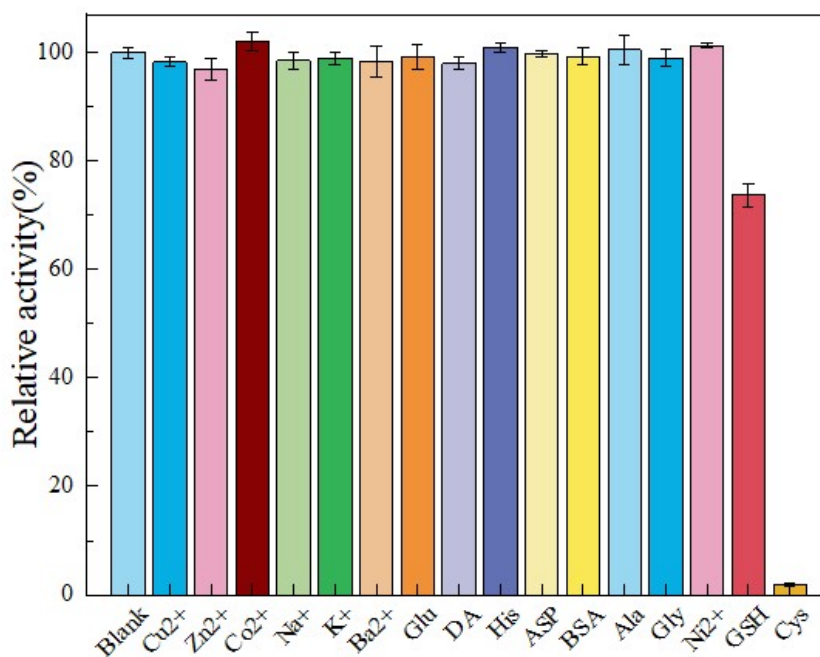

**Figure S5.** Effects of different interfering cations and biological macromolecules on POD-like activity of Fe<sub>0.75</sub>Ni<sub>0.25</sub>S<sub>2</sub>/SC.

## REFERENCES

- [1] A. M. Roudi; S. Salem; M. Abedini; A. MaslahatiM. Imran. Response Surface Methodology (RSM)-Based Prediction and Optimization of the Fenton Process in Landfill Leachate Decolorization. *Processes*, 2021, **9**, 2284.



- [2] R. Tabaraki; S. Zadkhast; A. NajafiV. R. Moghaddam. Performance and cost analysis of dye wastewater treatment by Fenton, electro-Fenton, and biosorption: Box-Behnken experimental design and response surface methodology. *Biomass. Convers. Bior.*, 2022.
- [3] D. A. Aljuboury; P. Palaniandy; H. B. A. Aziz; S. Feroz. Evaluation of the solar photo-Fenton process to treat the petroleum wastewater by response surface methodology (RSM). *Environ. Earth. Sci.*, 2016, **75**, 333.
- [4] S. Xin; G. Liu; X. Ma; J. GongY. Xin. High efficiency heterogeneous Fenton-like catalyst biochar modified CuFeO<sub>2</sub> for the degradation of tetracycline: Economical synthesis, catalytic performance and mechanism. *Appl. Catal. B.*, 2020, **280**, 119386.
- [5] J. Chen; G. Li; H. Yong; H. Zhang; H. Zhao; T. An. Optimization synthesis of carbon nanotubes-anatase TiO<sub>2</sub> composite photocatalyst by response surface methodology for photocatalytic degradation of gaseous styrene. *Appl. Catal. B.*, 2012, **123-124**, 69-77.
- [6] R. Hazime; Q. H. Nguyen; C. Ferronato; T. HuynhJ. M. Chovelon. Optimization of imazalil removal in the system UV/TiO<sub>2</sub>/K<sub>2</sub>S<sub>2</sub>O<sub>8</sub> using a response surface methodology (RSM). *Appl. Catal. B.*, 2013, **132-133**, 519-526.
